# Supplementary material for: MicroRNA-1296 Facilitates Proliferation, Migration And Invasion Of Colorectal Cancer Cells By Targeting SFPQ
Source: PubMed Central journal article supplement — J Cancer. 2018 Jun 6;9(13):2317–26. doi: 10.7150/jca.25427 (PMC6036719; doi:10.7150/jca.25427), 2018-06-06
Supplement: jcav09p2317s1.pdf [file jcav09p2317s1.pdf]

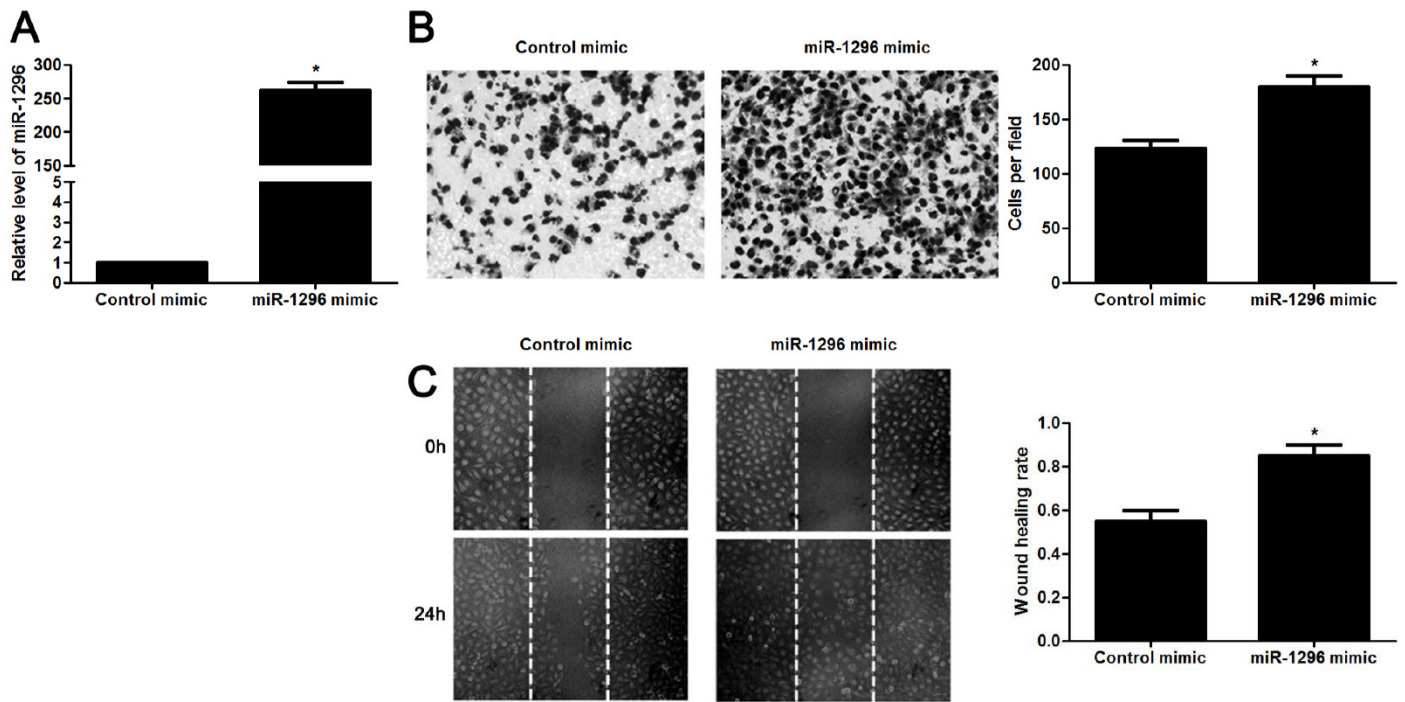

**Figure S1 MiR-1296 restoration facilitates migration and invasion of SW480 cells.** (A) SW480 cells that were transfected with miR-1296 mimic and control mimice, respectively, were subjected to qRT-PCR for miR-1296 expression. n=three independent experiments, \*P<0.05 by Student's t-test. SW480 cells with miR-1296 overexpression were treated with a proliferation blocker mitomycin C (10  $\mu$ g/ml) for 2 h prior to the wound healing and transwell assay. (B) The number of invaded cells was significantly increased after miR-1296 overexpression in SW480 cells. n= five fields of three independent experiments, \*P<0.05 by Student's t-test. (C) Wound healing assays indicated that miR-1296 overexpression promoted the migration of SW480 cells. n=three independent experiments, \*P<0.05 by Student's t-test.

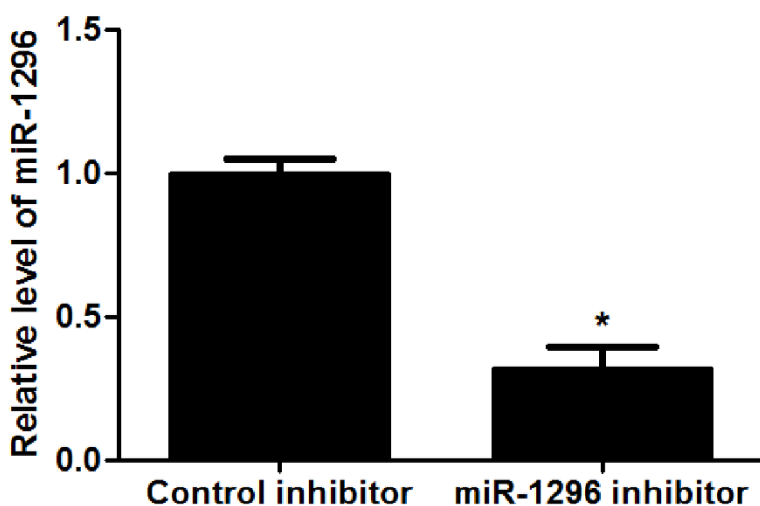

**Figure S2 The expression of miR-1296 in xenograft tumor tissues from mice.** Xenograft tumor tissues arising from miR-1296 knockdown group showed a significant lower miR-1296 expression compared to control group. n=5, \*P<0.05 by Student's t-test.
